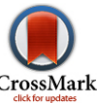

## Correction

# Correction: Incorporating Cache Management Behavior into Seed Dispersal: The Effect of Pericarp Removal on Acorn Germination

The PLOS ONE Staff

There are errors in Table 1 and the legend of Figure 3. The correct statistics for the experimental study shown in Table 1 are as follows:

*Q. variabilis*:  $\chi^2 = 0.125$ ,  $df = 1$ ,  $P = 0.724$ ; *Q. aliena*:  $\chi^2 = 1.865$ ,  $df = 1$ ,  $P = 0.172$ ; *Q. serrata* var. *brevipetiolata*:  $\chi^2 = 0$ ,  $df = 1$ ,  $P = 1$ .

The authors have provided the corrected versions of Table 1 and Figure Legend 3, which can be viewed [here](#).

**Citation:** The PLOS ONE Staff (2014) Correction: Incorporating Cache Management Behavior into Seed Dispersal: The Effect of Pericarp Removal on Acorn Germination. PLoS ONE 9(8): e104726. doi:10.1371/journal.pone.0104726

**Published:** August 1, 2014

**Copyright:** © 2014 The PLOS ONE Staff. This is an open-access article distributed under the terms of the Creative Commons Attribution License, which permits unrestricted use, distribution, and reproduction in any medium, provided the original author and source are credited.

**Table 1.** The percentage of acorns that germinated in each species when pericarps were removed and when acorns were intact.

| Species                                      | Field study               |                       | Experimental study        |                       |
|----------------------------------------------|---------------------------|-----------------------|---------------------------|-----------------------|
|                                              | Pericarp removed (n = 50) | Acorn intact (n = 50) | Pericarp removed (n = 25) | Acorn intact (n = 25) |
| <i>Q. aliena</i>                             | 92 <sup>a</sup>           | 64 <sup>b</sup>       | 88 <sup>a</sup>           | 68 <sup>a</sup>       |
| <i>Q. variabilis</i>                         | 84 <sup>a</sup>           | 60 <sup>b</sup>       | 76 <sup>a</sup>           | 84 <sup>a</sup>       |
| <i>Q. serrata</i> var. <i>brevipetiolata</i> | 72 <sup>a</sup>           | 36 <sup>b</sup>       | 48 <sup>a</sup>           | 52 <sup>a</sup>       |

Acorns in the field study had the pericarps removed by Siberian chipmunks, while the acorns in the experimental study had the pericarps artificially removed. Different letters in the same row indicate significance ( $P < 0.05$ ) for the field and experimental studies.

doi:10.1371/journal.pone.0092544.t001

## Reference

1. Yi X, Zhang M, Bartlow AW, Dong Z (2014) Incorporating Cache Management Behavior into Seed Dispersal: The Effect of Pericarp Removal on Acorn Germination. PLoS ONE 9(3): e92544. doi:10.1371/journal.pone.0092544

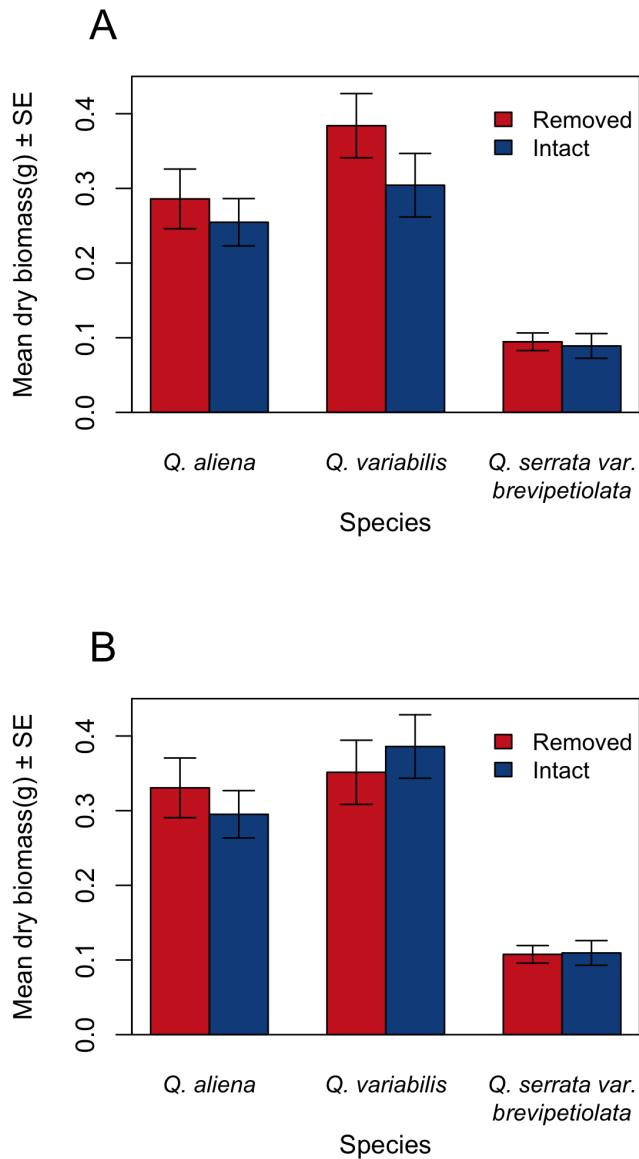

**Figure 3. Dry masses of the roots (A) and epicotyls (B) of seedlings of three oak species germinated from intact acorns and those with pericarps removed by Siberian chipmunks.** All the dry masses of the epicotyls and roots were not significant between intact and pericarp-removed acorns for all species ( $P > 0.05$ ). doi:10.1371/journal.pone.0092544.g003
